# Supplementary material for: Structure evolution of nanoparticulate Fe2O3
Source: Royal Society of Chemistry journal article supplement (doi:10.1039/c4nr06989g), 2014-12-23
Supplement: c4nr06989g1.pdf [file c4nr06989g1.pdf]

## Electronic Supplementary Information

### Structure evolution of nanoparticulate $\text{Fe}_2\text{O}_3$

Andreas Erlebach, Heinz-Dieter Kurland, Janet Grabow, Frank A. Müller and Marek Sierka

*Otto-Schott-Institut für Materialforschung, Friedrich-Schiller-Universität Jena,  
Löbdergraben 32, 07743 Jena, Germany*

#### Melting of $\alpha\text{-Fe}_2\text{O}_3$

Figure S1 shows the results of MD simulations for bulk  $\text{Fe}_2\text{O}_3$  equilibrated at several temperatures between 1800 and 2200 K. After equilibration at 2000 K (Fig. S1a) the structure remains crystalline. In contrast, at 2050 K an amorphous liquid state emerges (Fig. S2b). The phase transition can be seen as a sudden increase of potential energy,  $\Delta E_{\text{pot}}$ , corresponding to the melting point at about 2025 K.

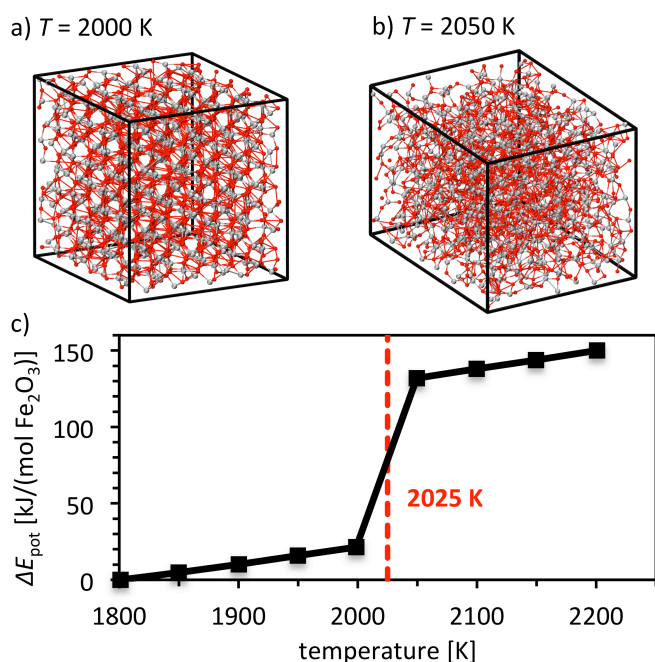

**Fig. S1** Simulated melting of bulk  $\alpha\text{-Fe}_2\text{O}_3$ : orthogonal unit cells equilibrated at a) 2000 K, b) 2050 K and c) corresponding potential energy change,  $\Delta E_{\text{pot}}$ , as a function of temperature. Fe: grey, O: red.

#### Simulated annealing of NP5

Figure S2 shows comparison of the total radial distribution function  $G(r_{ij})$  averaged over last 500 ps of equilibration phase at 2000 K for two initial configurations **NP5a** and **NP5b**. The initial structures were created as spherical cutouts from  $\alpha\text{-Fe}_2\text{O}_3$  (**NP5a**) and  $\gamma\text{-Fe}_2\text{O}_3$  (**NP5b**) with diameter of 5 nm. For both **NP5a** and **NP5b** almost identical, amorphous structure of their molten state was obtained. This confirms that

the equilibration at 2000 K was sufficient to generate NP models that are independent from their initial configuration.

The most stable structures determined by simulated annealing of both initial NP models are shown in Figure S3 along with histograms of their coordination number (CN) distributions. CN for Fe and O atoms were calculated for the inner NP core with diameters of 4 nm as well as the entire NP. The lowest energy configuration of **NP5b** is only 1.92 kJ/(mol  $\text{Fe}_2\text{O}_3$ ) higher in energy than **NP5a**. Both NP show virtually the same structural patterns as well as CN distributions resembling  $\epsilon\text{-Fe}_2\text{O}_3$ . In particular,  $\epsilon\text{-Fe}_2\text{O}_3$  contains 25 % tetrahedrally and 75 % octahedrally coordinated Fe atoms that are similar to the fractions for both NP cores. The fractions of CN for O atoms in  $\epsilon\text{-Fe}_2\text{O}_3$  are 0.5, 0.33 and 0.17 for 3-, 4- and 5-fold coordination, respectively. The deviation of the NP structure from the ideal  $\epsilon\text{-Fe}_2\text{O}_3$  ratios is related to the presence of structural defects within the annealed NP. However, the considerable amount of 5-fold coordinated O atoms and the Fe CN distributions indicate that the structures **NP5a** and **NP5b** are equivalent to  $\epsilon\text{-Fe}_2\text{O}_3$ .

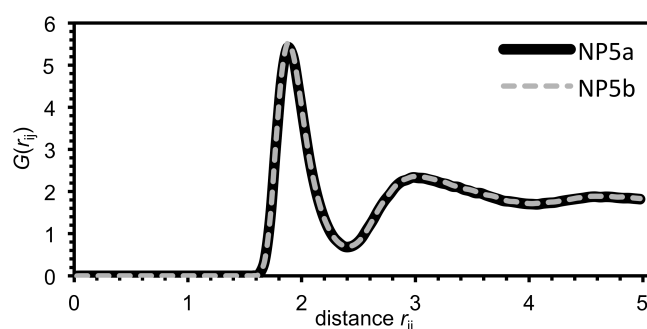

**Fig. S2** Total radial distribution function  $G(r_{ij})$  for **NP5a** and **NP5b** equilibrated at 2000 K.

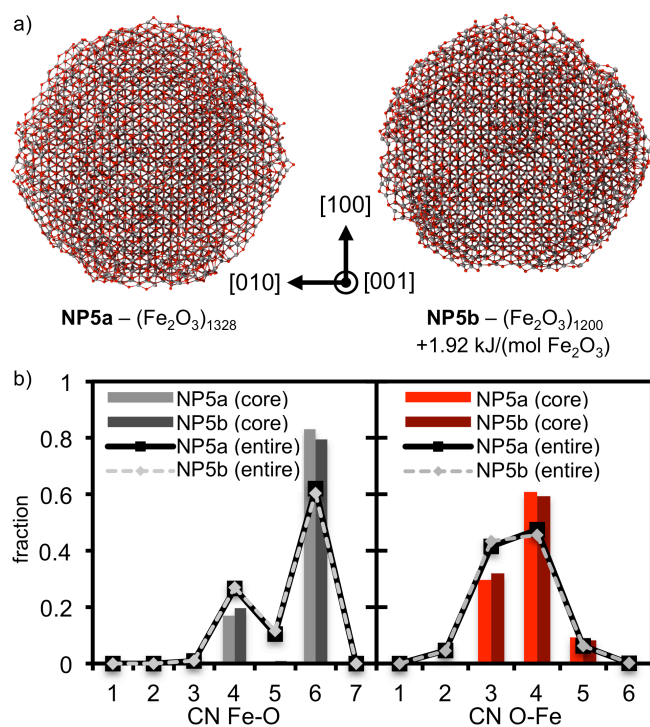

**Fig. S3** Comparison of **NP5a** and **NP5b** structures: (a) view onto (001) plane, (b) coordination number (CN) distribution of Fe and O atoms for the NP core (4 nm in diameter) and the entire NP. Fe: grey, O: red.
